# Supplementary material
Source: ML conference proceedings conference paper supplement (https://proceedings.mlr.press/v72/barnard18a.html)
Supplement: Supplementary file 1 [file barnard18a-supp.pdf]

# Supplement to Causal Structure Learning via Temporal Markov Networks

## 1. Experiments

### 1.1 Method Parameters

Here are the specific parameters of the methods and their rationales. We used the Center for Causal Discovery’s Java implementation of the PC algorithm which is based on the Tetrad implementation from Carnegie Mellon University.

- PC
  - $\alpha$ : 0.01. Decided to ensure approximately one Type 1 error per 10-node graph.
  - depth: 10. Decided to correspond with the maximum number of nodes in the synthetic data and the maximum number of parents (drugs) in the OMOP data.
- BNFinder
  - score: BDe. Tuned, but the Bayesian Dirichlet equivalence score performs no differently than the minimum description length score.
  - maximum parents: 10. Decided to correspond with the maximum number of nodes in the synthetic data and the maximum number of parents (drugs) in the OMOP data.
- Temporal Markov networks using Optim.jl
  - maximum optimization iterations: 1000. Software default.
  - gradient infinity-norm bound: 1e-8. Software default.
  - L-BFGS approximation vectors: 10. Software default.

### 1.2 Synthetic DBN Experiments

In the synthetic data experiments, the goal was to recover the structure of random DBNs given datasets of timelines sampled from those DBNs. Each dataset received four data treatments designed to test the methods in the face of noise, missing timesteps, and confounding. The plain treatment left the data unaltered. The noisy treatment selected  $X_{i,t}$  IID if Bernoulli( $\varepsilon$ ) and replaced selected values with  $x_{i,t} \sim \text{Bernoulli}(1/2)$ . Each dataset had its own noise level  $\varepsilon \sim \text{Uniform}(0.1, 0.9)$ . The missing treatment selected timesteps IID if Bernoulli( $\eta$ ) and hid their values. This was meant to imitate how patients are unobserved in real EMR data and to measure the influence of assuming unobserved values to be false. Each dataset had its own missingness level  $\eta \sim \text{Uniform}(0.1, 0.9)$ . The confounding treatment randomly selected a subset of confounders (variables with at least two children) and removed them from the data and the ground truth graph. Specifically, the DBN graph was compressed (rolled up) (Plis et al., 2015), confounders were randomly selected so that no more than 2/5 of the variables would be hidden and so that the class proportion remained in  $[0.1, 0.9]$ , the confounding variables were removed from the graph by summing them out, and the graph was uncompressed to become the new ground truth graph. For each of the four data treatments the data was represented in two ways: fully-observed and condensed, as illustrated in Figures 2b and 2c. The condensed data imitates real EMR data where negatives are typically not recorded and absolute times are not reliable, but it also simplifies the problem of modeling events that occur over widely-varying time scales.

Each DBN was generated by (1) drawing a number of variables  $n \in 2:10$  from a distribution that favors numbers in proportion to their size, (2) drawing an edge probability  $p_e \sim \text{Uniform}(0, 1)$  and drawing each of the  $n^2$  possible forward DBN edges IID as Bernoulli( $p_e$ ) to create a bipartite graph representing two timesteps, (3) creating conditional probability tables by sampling a probability  $p \sim \text{Uniform}(0, 1)$  for each setting of a node’s parents, and (4) rejecting any DBN with edge density ( $|E|/n^2$ ) not in  $[0.1, 0.9]$  (which kept the class skew less than 9 : 1).

The synthetic data consisted of datasets sampled from 1k random DBNs. Each dataset had 10k timelines; each timeline had 10 timesteps. Experiments were performed on the first 100, 1k, and 10k timelines of each dataset to assess statistical efficiency. The number of DBNs was determined by a power calculation for a 0.9 probability of detecting a PR area difference of 0.01 at  $\alpha = 0.01$  with a two-tailed paired t-test. In total, there were 120k experiments: 1k random DBNs, 4 data treatments, 2 data representations, 3 data sizes, and 5 methods (PC, TMN-PC, BNF-DBN, TMN-DBN, TMN-Bf3).

### 1.3 OMOP Experiments

The number of replicates was determined by a power calculation for a 0.9 probability of detecting a PR area difference of 0.05 at  $\alpha = 0.01$  with a two-tailed paired t-test.

## 2. Results

The following tables and figures include additional analysis of the experimental results. Table 2 contains a linear regression on the synthetic data results that includes interactions between methods and data regimes, and Table 3 contains the detailed results of the pairwise comparisons and their statistical significance. The names and descriptions of the experimental data regimes are in Table 1.

| Name  | Data Regime                                 |
|-------|---------------------------------------------|
| Plain | unaltered synthetic timelines               |
| Noisy | synthetic timelines with noise              |
| MisTs | synthetic timelines with missing timesteps  |
| Cnfr  | synthetic timelines with hidden confounders |
| OMOP  | condensed OMOP timelines                    |

Table 1: Experimental data regimes

## References

- S. Plis, D. Danks, C. Freeman, and V. Calhoun. Rate-agnostic (causal) structure learning. In *Advances in Neural Information Processing Systems* 28, 2015.

| Rank | $X$              | $\hat{\beta}$ | $se(\hat{\beta})$ | TStat  | P-Value   |
|------|------------------|---------------|-------------------|--------|-----------|
| 1    | BNF-DBN? * cnfdr | -0.713        | 0.0139            | -51.2  | 0         |
| 2    | density, $e/n^2$ | 0.663         | 0.0117            | 56.9   | 0         |
| 3    | TMN-PC? * cnfdr  | -0.553        | 0.0139            | -39.7  | 0         |
| 4    | PC? * cnfdr      | -0.499        | 0.0139            | -35.9  | 1.69e-280 |
| 5    | TMN-DBN? * cnfdr | -0.475        | 0.0139            | -34.1  | 7.15e-254 |
| 6    | TMN-Bf3? * cnfdr | -0.454        | 0.0139            | -32.6  | 3.16e-232 |
| 7    | BNF-DBN? * noise | -0.414        | 0.00547           | -75.7  | 0         |
| 8    | BNF-DBN?         | 0.400         | 0.00188           | 213    | 0         |
| 9    | TMN-PC?          | 0.309         | 0.00188           | 165    | 0         |
| 10   | BNF-DBN? * mists | -0.305        | 0.00537           | -56.8  | 0         |
| 11   | PC? * noise      | -0.287        | 0.00547           | -52.5  | 0         |
| 12   | TMN-PC? * noise  | -0.281        | 0.00547           | -51.4  | 0         |
| 13   | TMN-Bf3? * noise | -0.251        | 0.00547           | -45.8  | 0         |
| 14   | PC? * mists      | -0.248        | 0.00537           | -46.1  | 0         |
| 15   | PC?              | 0.245         | 0.00188           | 131    | 0         |
| 16   | TMN-DBN? * noise | -0.225        | 0.00547           | -41.1  | 0         |
| 17   | TMN-DBN?         | 0.217         | 0.00188           | 115    | 0         |
| 18   | TMN-PC? * mists  | -0.216        | 0.00537           | -40.2  | 0         |
| 19   | TMN-Bf3?         | 0.209         | 0.00188           | 111    | 0         |
| 20   | TMN-DBN? * mists | -0.169        | 0.00537           | -31.5  | 2.11e-216 |
| 21   | TMN-Bf3? * mists | -0.157        | 0.00537           | -29.2  | 1.26e-186 |
| 22   | # cnfdr / $n$    | 0.130         | 0.00996           | 13.1   | 3.99e-39  |
| 23   | log # data       | 0.0747        | 0.000430          | 174    | 0         |
| 24   | missingness      | -0.0227       | 0.00380           | -5.99  | 2.16e-09  |
| 25   | noise level      | -0.0213       | 0.00387           | -5.50  | 3.79e-08  |
| 26   | intercept        | -0.0121       | 0.00698           | -1.73  | 0.0833    |
| 27   | avg in-deg       | -0.0109       | 0.00820           | -1.33  | 0.184     |
| 28   | max in-deg       | -0.00795      | 0.000607          | -13.1  | 3.39e-39  |
| 29   | # edges, $e$     | 0.00533       | 0.000421          | 12.7   | 1.07e-36  |
| 30   | # nodes, $2n$    | -0.00167      | 0.00117           | -1.42  | 0.156     |
| 31   | # V-structures   | -0.00138      | 6.06e-05          | -22.7  | 1.06e-113 |
| 32   | condensed?       | 0.000733      | 0.000702          | 1.04   | 0.296     |
| 33   | max edges, $n^2$ | -0.000375     | 0.000184          | -2.04  | 0.0417    |
| 34   | max out-deg      | -0.000243     | 0.000638          | -0.381 | 0.703     |
| 35   | # CPT $\theta$ s | 3.11e-05      | 1.86e-06          | 16.7   | 1.75e-62  |

Table 2: Linear regression of PR area on attributes of synthetic DBN experiments, including interactions between method and data regime, ranked by  $\hat{\beta}$  magnitude.  $R^2 = 0.699$ . The method indicators contrast with random guessing.

| Rank | Better        | Worse         | DiffMeans | TStatistic | P-Value   |
|------|---------------|---------------|-----------|------------|-----------|
| 1    | BNF-DBN-Plain | Random-Plain  | 0.480     | 92.2       | 0         |
| 2    | TMN-PC-Plain  | Random-Plain  | 0.447     | 89.5       | 0         |
| 3    | TMN-Bf3-Plain | Random-Plain  | 0.362     | 83.4       | 0         |
| 4    | TMN-DBN-Plain | Random-Plain  | 0.304     | 81.0       | 0         |
| 5    | PC-Plain      | Random-Plain  | 0.398     | 77.4       | 0         |
| 6    | BNF-DBN-MisTs | Random-MisTs  | 0.367     | 68.5       | 0         |
| 7    | TMN-PC-MisTs  | Random-MisTs  | 0.313     | 65.5       | 0         |
| 8    | BNF-DBN-Noisy | Random-Noisy  | 0.319     | 60.2       | 0         |
| 9    | BNF-DBN-Cnfr  | Random-Cnfr   | 0.260     | 59.2       | 0         |
| 10   | TMN-PC-Noisy  | Random-Noisy  | 0.308     | 59.1       | 0         |
| 11   | TMN-PC-Cnfr   | Random-Cnfr   | 0.246     | 56.8       | 0         |
| 12   | TMN-DBN-MisTs | Random-MisTs  | 0.191     | 53.1       | 0         |
| 13   | TMN-Bf3-MisTs | Random-MisTs  | 0.228     | 52.9       | 0         |
| 14   | BNF-DBN-Plain | TMN-DBN-Plain | 0.176     | 50.0       | 0         |
| 15   | TMN-Bf3-Cnfr  | Random-Cnfr   | 0.167     | 49.9       | 0         |
| 16   | BNF-DBN-Noisy | PC-Noisy      | 0.107     | 49.8       | 0         |
| 17   | TMN-DBN-Noisy | Random-Noisy  | 0.172     | 48.6       | 0         |
| 18   | TMN-PC-Noisy  | PC-Noisy      | 0.0963    | 47.1       | 0         |
| 19   | BNF-DBN-MisTs | PC-MisTs      | 0.151     | 47.0       | 0         |
| 20   | PC-Cnfr       | Random-Cnfr   | 0.194     | 46.6       | 7.41e-322 |
| 21   | PC-MisTs      | Random-MisTs  | 0.216     | 46.6       | 7.91e-322 |
| 22   | BNF-DBN-Plain | PC-Plain      | 0.0821    | 45.2       | 8.61e-308 |
| 23   | PC-Noisy      | Random-Noisy  | 0.212     | 44.1       | 1.15e-297 |
| 24   | TMN-PC-Plain  | TMN-DBN-Plain | 0.143     | 43.6       | 5.15e-292 |
| 25   | TMN-DBN-Cnfr  | Random-Cnfr   | 0.140     | 41.9       | 2.36e-276 |
| 26   | BNF-DBN-MisTs | TMN-DBN-MisTs | 0.176     | 41.6       | 5.19e-273 |
| 27   | TMN-Bf3-Noisy | Random-Noisy  | 0.162     | 40.9       | 6.11e-266 |
| 28   | TMN-PC-MisTs  | PC-MisTs      | 0.0973    | 40.0       | 1.39e-257 |
| 29   | BNF-DBN-Noisy | TMN-DBN-Noisy | 0.147     | 37.5       | 9.95e-234 |
| 30   | BNF-DBN-Noisy | TMN-Bf3-Noisy | 0.157     | 36.5       | 1.20e-223 |
| 31   | TMN-PC-Noisy  | TMN-DBN-Noisy | 0.136     | 35.2       | 2.64e-211 |
| 32   | BNF-DBN-Cnfr  | PC-Cnfr       | 0.0657    | 34.3       | 5.39e-203 |
| 33   | BNF-DBN-Cnfr  | TMN-DBN-Cnfr  | 0.120     | 33.5       | 1.93e-195 |
| 34   | TMN-PC-Noisy  | TMN-Bf3-Noisy | 0.146     | 33.2       | 6.38e-193 |
| 35   | TMN-PC-Plain  | PC-Plain      | 0.0495    | 33.2       | 1.45e-192 |
| 36   | TMN-PC-MisTs  | TMN-DBN-MisTs | 0.122     | 32.3       | 2.95e-184 |
| 37   | BNF-DBN-MisTs | TMN-Bf3-MisTs | 0.139     | 31.8       | 9.87e-180 |
| 38   | TMN-PC-Cnfr   | TMN-DBN-Cnfr  | 0.106     | 30.9       | 3.77e-172 |
| 39   | BNF-DBN-Plain | TMN-Bf3-Plain | 0.118     | 30.4       | 1.65e-167 |
| 40   | TMN-PC-Cnfr   | PC-Cnfr       | 0.0515    | 29.5       | 3.56e-159 |

Table 3: Pairwise comparisons between methods within the five data regimes (Table 1) using two-tailed paired t-tests, ranked by p-value. The row with the lines indicates the significance cutoff of a paper-wise false discovery rate controlled at 0.01 with the Benjamini-Hochberg procedure.

| Rank | Better        | Worse         | DiffMeans | TStatistic | P-Value   |
|------|---------------|---------------|-----------|------------|-----------|
| 41   | PC-Plain      | TMN-DBN-Plain | 0.0934    | 26.5       | 1.30e-132 |
| 42   | BNF-DBN-Cnfr  | TMN-Bf3-Cnfr  | 0.0933    | 24.4       | 2.49e-115 |
| 43   | TMN-PC-Plain  | TMN-Bf3-Plain | 0.0851    | 22.8       | 2.17e-102 |
| 44   | BNF-DBN-Plain | TMN-PC-Plain  | 0.0327    | 21.3       | 8.01e-91  |
| 45   | TMN-PC-Cnfr   | TMN-Bf3-Cnfr  | 0.0790    | 21.1       | 1.05e-89  |
| 46   | TMN-Bf3-Plain | TMN-DBN-Plain | 0.0578    | 20.2       | 4.54e-83  |
| 47   | TMN-PC-MisTs  | TMN-Bf3-MisTs | 0.0855    | 20.1       | 5.41e-82  |
| 48   | BNF-DBN-MisTs | TMN-PC-MisTs  | 0.0538    | 17.8       | 4.57e-66  |
| 49   | PC-Cnfr       | TMN-DBN-Cnfr  | 0.0546    | 15.8       | 3.29e-53  |
| 50   | PC-Noisy      | TMN-Bf3-Noisy | 0.0493    | 12.6       | 7.45e-35  |
| 51   | BNF-DBN-OMOP  | Random-OMOP   | 0.0580    | 18.1       | 3.05e-33  |
| 52   | TMN-Bf3-MisTs | TMN-DBN-MisTs | 0.0368    | 10.9       | 5.90e-27  |
| 53   | PC-Noisy      | TMN-DBN-Noisy | 0.0396    | 10.8       | 2.61e-26  |
| 54   | TMN-Bf3-Cnfr  | TMN-DBN-Cnfr  | 0.0270    | 10.4       | 1.19e-24  |
| 55   | TMN-Bf3-OMOP  | Random-OMOP   | 0.114     | 12.2       | 1.70e-21  |
| 56   | BNF-DBN-Noisy | TMN-PC-Noisy  | 0.0110    | 9.11       | 2.01e-19  |
| 57   | PC-Plain      | TMN-Bf3-Plain | 0.0356    | 8.79       | 3.29e-18  |
| 58   | PC-OMOP       | Random-OMOP   | 0.0353    | 10.4       | 1.68e-17  |
| 59   | TMN-PC-OMOP   | Random-OMOP   | 0.0655    | 10.3       | 2.73e-17  |
| 60   | BNF-DBN-Cnfr  | TMN-PC-Cnfr   | 0.0142    | 7.91       | 4.18e-15  |
| 61   | TMN-DBN-OMOP  | Random-OMOP   | 0.0524    | 8.77       | 5.14e-14  |
| 62   | PC-Cnfr       | TMN-Bf3-Cnfr  | 0.0275    | 7.45       | 1.37e-13  |
| 63   | TMN-Bf3-OMOP  | PC-OMOP       | 0.0783    | 8.11       | 1.40e-12  |
| 64   | BNF-DBN-OMOP  | PC-OMOP       | 0.0227    | 7.86       | 4.70e-12  |
| 65   | PC-MisTs      | TMN-DBN-MisTs | 0.0249    | 6.80       | 1.39e-11  |
| 66   | TMN-Bf3-OMOP  | BNF-DBN-OMOP  | 0.0556    | 5.93       | 4.47e-08  |
| 67   | TMN-Bf3-OMOP  | TMN-DBN-OMOP  | 0.0612    | 5.45       | 3.76e-07  |
| 68   | TMN-Bf3-OMOP  | TMN-PC-OMOP   | 0.0481    | 4.40       | 2.78e-05  |
| 69   | TMN-DBN-Noisy | TMN-Bf3-Noisy | 0.00977   | 4.06       | 5.00e-05  |
| 70   | TMN-PC-OMOP   | PC-OMOP       | 0.0303    | 4.21       | 5.59e-05  |
| —    | —             | —             | —         | —          | — BH 0.01 |
| 71   | TMN-Bf3-MisTs | PC-MisTs      | 0.0119    | 2.81       | 0.00494   |
| 72   | TMN-DBN-OMOP  | PC-OMOP       | 0.0171    | 2.52       | 0.0132    |
| 73   | TMN-PC-OMOP   | TMN-DBN-OMOP  | 0.0131    | 1.97       | 0.0513    |
| 74   | TMN-PC-OMOP   | BNF-DBN-OMOP  | 0.00755   | 1.04       | 0.300     |
| 75   | BNF-DBN-OMOP  | TMN-DBN-OMOP  | 0.00559   | 0.822      | 0.413     |

Table 4: Pairwise comparisons, part 2 of Table 3
